# Supplementary material for: Interconnected 3D fluorinated graphene host enables an ultrastable lithium metal anode
Source: Royal Society of Chemistry journal article supplement (doi:10.1039/d2nj00432a), 2022-01-01
Supplement: d2nj00432a1.pdf [file d2nj00432a1.pdf]

## Interconnected 3D fluorinated graphene host enabling ultrastable lithium metal anode

Qi Shan, Yanan Fang, Xinyu Tian, Lan Yang, Pan Li\*, and Xiaomiao Feng\*

Key Laboratory for Organic Electronics and Information Displays & Institute of Advanced Materials (IAM), Jiangsu National Synergetic Innovation Center for Advanced Materials (SICAM), School of Materials Science & Engineering, Nanjing University of Posts and Telecommunications, 9 Wenyuan Road, Nanjing 210023, China

\* Corresponding author.

E-mail address: [iamxmfeng@njupt.edu.cn](mailto:iamxmfeng@njupt.edu.cn); [iampli@njupt.edu.cn](mailto:iampli@njupt.edu.cn)

Table S1 EDS element analysis result of FG-150

| Element | C    | O    | F   |
|---------|------|------|-----|
| Atomic% | 84.3 | 12.6 | 3.1 |

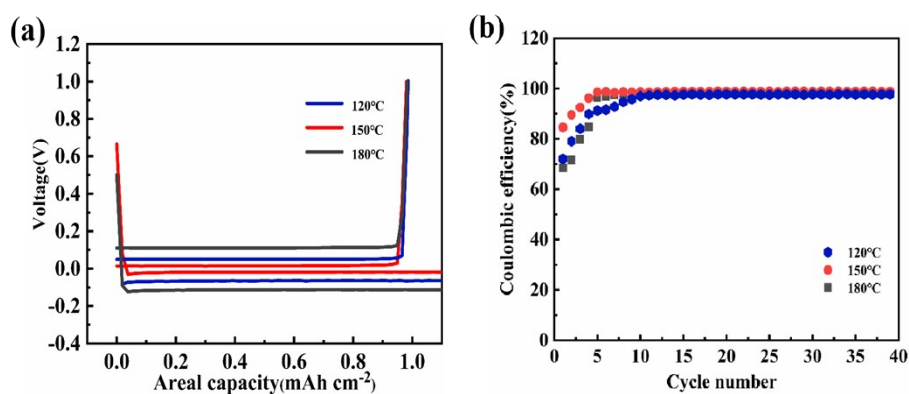

**Figure S1** Electrochemical characterization of FG (a). The first-cycle constant current charge-discharge curve of the current collector under different temperature conditions; (b) Coulomb efficiency diagram of the first cycle of the current collector under different temperature conditions.

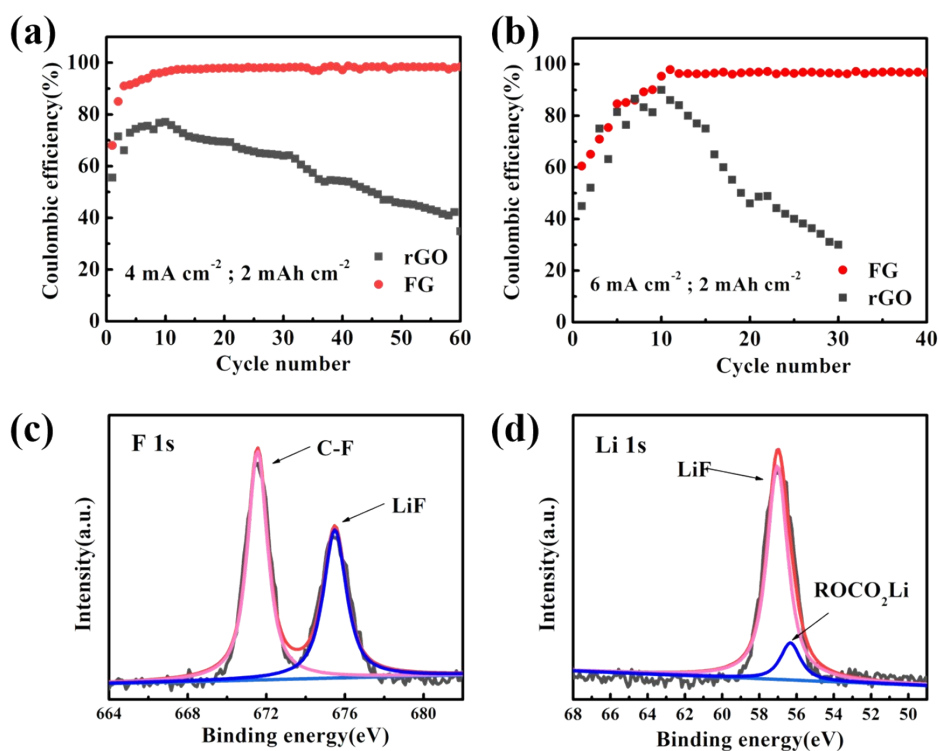

**Figure S2** Comparison of Coulomb efficiency of FG@Cu and the comparative electrode are at current density of  $4 \text{ mA cm}^{-2}$  (a) and  $6 \text{ mA cm}^{-2}$  (b) with cycle capacity of  $2 \text{ mAh cm}^{-2}$ . The XPS spectra of F 1s (c) and Li 1s (d) of the SEI layer from the FG@Cu electrode after Li stripping.

**Table S2** the content of chemical bonds in the sample of FG-150

| Ascription  | C-C  | C-CF | C-O | C-F semi-ionic | C-F covalent | CF <sub>2</sub> | C-CF <sub>2</sub> |
|-------------|------|------|-----|----------------|--------------|-----------------|-------------------|
| Content (%) | 56.0 | 14.2 | 9.3 | 6.8            | 6.1          | 5.0             | 2.5               |

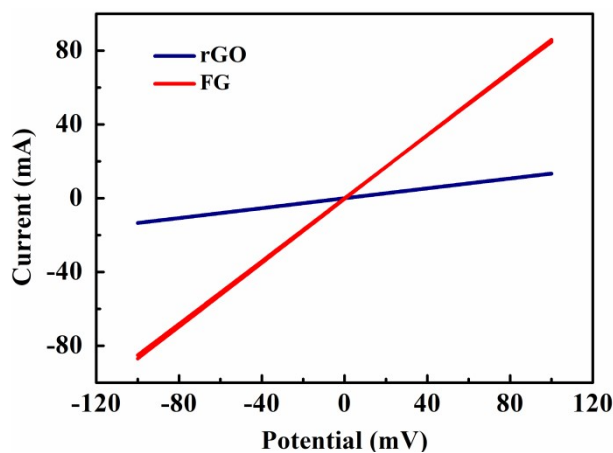

**Figure S3** The electrical conductivity of rGO and FG-150

$$\sigma = \frac{l}{Rs}$$

R is the electrical resistance, s is the cross-sectional area, and l is the length of the material. After calculation, the volume electrical conductivity of FG-150 is 1.11 S/m and rGO is 0.17 S/m.

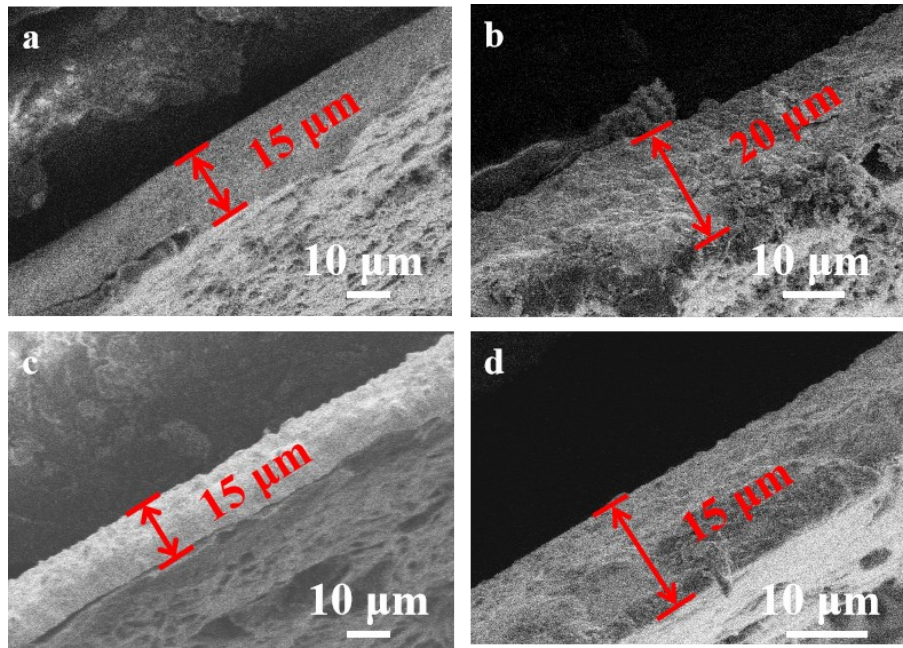

**Figure S4** SEM images of the cross-section of rGO@Cu electrode (a) before and (b) after 100 cycles; SEM images of the cross-section of FG@Cu electrode (c) before and (d) after 100 cycles.
